# Supplementary material for: Phenylketonuria screening and management in southeastern Europe – survey results from 11 countries
Source: Springer Nature journal article supplement (doi:10.1186/s13023-015-0283-0), 2015-05-29
Supplement: MOESM1 [file 9776146]

## QUESTIONNAIRE ON THE PKU MANAGEMENT AND THE NEWBORN SCREENING IN THE REGION OF THE SOUTH-EASTERN EUROPE

| I. <b>NEWBORN SCREENING PROGRAM CHARACTERISTICS</b>                                                                                                                                                                                                                                                                                                                                                                                                                                                                                                      |
|----------------------------------------------------------------------------------------------------------------------------------------------------------------------------------------------------------------------------------------------------------------------------------------------------------------------------------------------------------------------------------------------------------------------------------------------------------------------------------------------------------------------------------------------------------|
| 1. The first year of the PKU screening in the whole country:                                                                                                                                                                                                                                                                                                                                                                                                                                                                                             |
| 2. The estimated number of the screened newborns in year 2012:                                                                                                                                                                                                                                                                                                                                                                                                                                                                                           |
| 3. The number of all the newborns in your country in year 2012:                                                                                                                                                                                                                                                                                                                                                                                                                                                                                          |
| 4. Age of newborn when screened ( <b>in hours</b> ):                                                                                                                                                                                                                                                                                                                                                                                                                                                                                                     |
| 5. The estimated incidence of classic PKU in your country:<br>Please provide a published reference if exists:                                                                                                                                                                                                                                                                                                                                                                                                                                            |
| 6. The estimated incidence of all hyperphenylalaninemias (cases over cut-off value in screening) in your country:                                                                                                                                                                                                                                                                                                                                                                                                                                        |
| 7. The current laboratory method of the PKU screening:                                                                                                                                                                                                                                                                                                                                                                                                                                                                                                   |
| 8. The cut-off value for the phenylalanine in the screening:                                                                                                                                                                                                                                                                                                                                                                                                                                                                                             |
| 9. The estimated proportion of the patients who ever require the diet, comparing to all newborns above the cut off value in the PKU screening program:                                                                                                                                                                                                                                                                                                                                                                                                   |
| 10. Number of screening centers in your country:<br>Total population of your country:                                                                                                                                                                                                                                                                                                                                                                                                                                                                    |
| 11. Which diseases are mandatory screened in newborns in your country (please, list all of them with the year of the introduction of the screening for each)?                                                                                                                                                                                                                                                                                                                                                                                            |
| 12. Which laboratory methods are used for newborn screening in diseases <b>other</b> than PKU (please, list all)?                                                                                                                                                                                                                                                                                                                                                                                                                                        |
| 13. Do you plan to expand the newborn screening program in the next 5 years (if yes, when expectantly)?                                                                                                                                                                                                                                                                                                                                                                                                                                                  |
| 14. Which additional diseases would you like to add to the existing newborn screening program (please, list all)?                                                                                                                                                                                                                                                                                                                                                                                                                                        |
| 15. Is the existing newborn screening program country wide or regional or hospital based (please specify)?                                                                                                                                                                                                                                                                                                                                                                                                                                               |
| 16. Who is currently financing the existing newborn screening program (e.g. national insurance system, or the ministry for health, or regions, or private, ...)?                                                                                                                                                                                                                                                                                                                                                                                         |
| 17. Could you estimate the current costs per screened newborn (please calculate to Euro/newborn)?                                                                                                                                                                                                                                                                                                                                                                                                                                                        |
| 18. Which are the main obstacles in expanding the newborn screening program (please list three or more)?                                                                                                                                                                                                                                                                                                                                                                                                                                                 |
| 19. Are you a part of any international cooperation/program in newborn screening (please specify)?                                                                                                                                                                                                                                                                                                                                                                                                                                                       |
| 20. How urgent do you find expanding the existing newborn screening program, please give an estimate (on a 5 degree scale; from 0 - not at all, to 5 - extremely)?                                                                                                                                                                                                                                                                                                                                                                                       |
| II. <b>NATION-WIDE ORGANIZATION OF THE PKU CARE AND ITS CHARACTERISTICS</b>                                                                                                                                                                                                                                                                                                                                                                                                                                                                              |
| 21. Do you have national guidelines for PKU management (if yes, please add the publication details)?                                                                                                                                                                                                                                                                                                                                                                                                                                                     |
| 22. Which international PKU guidelines do you primarily follow?                                                                                                                                                                                                                                                                                                                                                                                                                                                                                          |
| 23. How many PKU centers are in your country (please specify according to the following categories)?<br>a. Pediatric only PKU centers:<br>b. Adult only PKU centers:<br>c. Combined – pediatric and adult PKU centers:                                                                                                                                                                                                                                                                                                                                   |
| 24. Do you have a national PKU registry in your country?                                                                                                                                                                                                                                                                                                                                                                                                                                                                                                 |
| 25. How many patients are currently included in the national PKU registry?                                                                                                                                                                                                                                                                                                                                                                                                                                                                               |
| 26. How many patients with BH4 deficiencies are currently included in the national PKU registry?                                                                                                                                                                                                                                                                                                                                                                                                                                                         |
| 27. How do you define PKU metabolic phenotypes (write lower limit in $\mu\text{M}$ of phenylalanine) and the recommendation for the treatment (until which age do you treat patients with given phenotype)?<br>a. Classic PKU (lower Phe limit in $\mu\text{M}$ ; until which age treated):<br>b. Moderate PKU (lower Phe limit in $\mu\text{M}$ ; until which age treated):<br>c. Mild PKU (lower Phe limit in $\mu\text{M}$ ; until which age treated):<br>d. Mild hyperphenylalaninemia (lower Phe limit in $\mu\text{M}$ ; until which age treated): |
| 28. The most common background of the PKU physicians (pediatricians, internists, others - specify):                                                                                                                                                                                                                                                                                                                                                                                                                                                      |
| 29. Who cares for the adults with PKU (pediatricians, internists, others - specify)?                                                                                                                                                                                                                                                                                                                                                                                                                                                                     |
| 30. Are amino-mixtures (PKU preparations) free of charge for the patients?                                                                                                                                                                                                                                                                                                                                                                                                                                                                               |
| 31. Any age limit for free prescription of amino-mixtures for adults?                                                                                                                                                                                                                                                                                                                                                                                                                                                                                    |

## QUESTIONNAIRE ON THE PKU MANAGEMENT AND THE NEWBORN SCREENING IN THE REGION OF THE SOUTH-EASTERN EUROPE

|                                                                                                                                                                                                                                          |
|------------------------------------------------------------------------------------------------------------------------------------------------------------------------------------------------------------------------------------------|
| 32. Do the patients get free low protein food; if yes please specify the amount per patient/month?                                                                                                                                       |
| 33. Do they get any extra money/financial support for the low protein food (if yes, any age limit?)?                                                                                                                                     |
| 34. Is BH4 treatment free of charge?                                                                                                                                                                                                     |
| 35. Age limit for BH4 treatment (please specify the lower and upper age limit)?                                                                                                                                                          |
| 36. Does your country have a patient's/parent's PKU society?                                                                                                                                                                             |
| 37. Could you estimate the proportion of patient members in the society comparing to the whole population of the PKU patients?                                                                                                           |
| 38. Is the national PKU society a member of E.S.PKU?                                                                                                                                                                                     |
| <b>III. ORGANIZATION OF THE PKU CARE IN YOUR CENTER AND ITS CHARACTERISTICS</b>                                                                                                                                                          |
| 39. Number of the patient (having a PKU diet) at your center in age groups:<br>a. <1 y:<br>b. 1-18 y:<br>c. >18 y:                                                                                                                       |
| 40. Could you estimate the proportions of the patients who are lost to follow up in the same age groups (only the patients who need the diet)?<br>a. <1 y:<br>b. 1-18:<br>c. >18:                                                        |
| 41. Could you specify the number of the patients with classical PKU (Phe > 1200 µM or Phe tolerance <250 mg in early childhood), and the number of other hyperphenylalaninemias on diet in the group of the patients in your PKU center: |
| 42. Could you estimate how many (number and/or % of all) are on diet (Phe < 800 µM) in >18 years group?                                                                                                                                  |
| 43. Number of patients with BH4 deficiencies in your center:                                                                                                                                                                             |
| 44. Do you routinely perform genotype analyses in PKU patients on diet?                                                                                                                                                                  |
| 45. Do you routinely perform genotype analyses in HPA/PKU patients not requiring diet?                                                                                                                                                   |
| 46. The lab method used for genotype analyses in your center:                                                                                                                                                                            |
| 47. The lab method(s) for Phe analyses in your center:                                                                                                                                                                                   |
| 48. Do you use BH4 in your PKU patients?                                                                                                                                                                                                 |
| 49. Do you routinely perform BH4 loading tests in PKU patients?                                                                                                                                                                          |
| 50. At what age do you perform BH4 loading tests in PKU patients?                                                                                                                                                                        |
| 51. The members of the PKU team in your center (number of physicians, dietitians, psychologists, nurses, others - specify (please, list all)):                                                                                           |
| 52. Do dietitians prepare dietary plans for the patients?                                                                                                                                                                                |
| 53. How frequently are patients psychologically assessed by a clinical psychologist (at what ages)?                                                                                                                                      |
| 54. Does your PKU center treat the PKU adults?                                                                                                                                                                                           |
| 55. Does your center take care of pregnant PKU women?                                                                                                                                                                                    |
| 56. How many PKU pregnancies did you have till now?                                                                                                                                                                                      |
